# Supplementary material
Source: PubMed Central journal article supplement (PMC3650548)
Supplement: JB.02280-12_zjb999092591so1.pdf [file JB.02280-12_zjb999092591so1.pdf]

## **Regulation of Iron Metabolism by *Pyrococcus furiosus***

Yixuan Zhu<sup>1,2</sup>, Sunil Kumar<sup>2,3</sup>, Angeli L. Menon<sup>2</sup>, Robert A. Scott<sup>1,2</sup> and

Michael W. W. Adams<sup>2\*</sup>

Departments of <sup>1</sup>Chemistry and <sup>2</sup>Biochemistry and Molecular Biology, University of  
Georgia, Athens, GA30602, USA

Present Addresses: <sup>3</sup>Department of Chemistry, School of Basic Sciences, Jaipur National  
University, Jaipur 302025, RJ, India

### **Supplementary Material**

**Tables S1-S3**

**Figure S1-S7**

**Table S1. ORFs whose expression is >2-fold up-regulated under iron-limited conditions and their potential operon arrangement.**

| <b>ORF</b>                               | <b>Description</b>                        | <b>COM1c2<br/>log<sub>2</sub> ± SD</b> | <b>COM1c2<br/>Fold<br/>change</b> | <b>ΔDTXR<br/>log<sub>2</sub> ± SD</b> | <b>ΔDTXR<br/>Fold<br/>Change</b> |
|------------------------------------------|-------------------------------------------|----------------------------------------|-----------------------------------|---------------------------------------|----------------------------------|
| <b>PF0685</b>                            | conserved hypothetical protein            | 1.2 ± 0.1                              | <b>2.2</b>                        | 1.2 ± 0.4                             | <b>2.3</b>                       |
| <b>PF0686</b>                            | hypothetical protein                      | 0.6 ± 0.2                              | 1.5                               | 0.9 ± 0.4                             | 1.9                              |
| <b>PF0687</b>                            | Transcription factor B-2                  | 1.0 ± 0.2                              | <b>2.0</b>                        | 1.1 ± 0.4                             | <b>2.2</b>                       |
| PF0692                                   | Prismane                                  | 1.1 ± 0.1                              | <b>2.1</b>                        | 1.7 ± 0.3                             | <b>3.2</b>                       |
| <b>PF0694</b>                            | flavoprotein                              | 0.4 ± 0.4                              | 1.3                               | 0.9 ± 0.8                             | 1.8                              |
| <b>PF0695</b>                            | hypothetical protein                      | 1.0 ± 0.2                              | <b>2.0</b>                        | 1.8 ± 0.6                             | <b>3.5</b>                       |
| <b>PF0696</b>                            | carbohydrate-binding protein              | 0.5 ± 0.2                              | 1.4                               | 0.6 ± 0.9                             | 1.5                              |
| †PF0723                                  | Ftr1 iron permease                        | 1.6 ± 0.2                              | <b>3.1</b>                        | 0.8 ± 0.3                             | 1.7                              |
| <b>PF0728</b>                            | hypothetical protein                      | 1.1 ± 0.4                              | <b>2.1</b>                        | 1.2 ± 0.4                             | <b>2.3</b>                       |
| <b>PF0729</b>                            | multi domain protein                      | 0.3 ± 0.7                              | 1.2                               | 1.1 ± 0.5                             | <b>2.1</b>                       |
| <b>Putative ferrous transporter</b>      |                                           |                                        |                                   |                                       |                                  |
| † <b>PF0857</b>                          | ferrous iron transport protein B          | 1.0 ± 0.0                              | <b>2.0</b>                        | -0.1 ± 0.1                            | 1.0                              |
| <b>PF0858</b>                            | conserved hypothetical                    | 0.3 ± 0.3                              | 1.2                               | -0.3 ± 0.3                            | 1.2                              |
| <b>Branched amino acids biosynthesis</b> |                                           |                                        |                                   |                                       |                                  |
| <b>PF0934</b>                            | hypothetical                              | 1.8 ± 0.3                              | <b>3.6</b>                        | 1.0 ± 0.5                             | 1.9                              |
| <b>PF0935</b>                            | acetolactate synthase                     | 2.2 ± 0.6                              | <b>4.6</b>                        | 1.7 ± 0.4                             | <b>3.3</b>                       |
| <b>PF0936</b>                            | ketol-acid reductoisomerase               | 2.5 ± 0.6                              | <b>5.5</b>                        | 1.8 ± 0.4                             | <b>3.4</b>                       |
| <b>PF0937</b>                            | 2-isopropylmalate synthase                | 2.3 ± 0.5                              | <b>4.9</b>                        | 1.7 ± 0.3                             | <b>3.3</b>                       |
| <b>PF0938</b>                            | 3-isopropyl malate dehydratase<br>II      | 2.2 ± 0.5                              | <b>4.7</b>                        | 1.7 ± 0.4                             | <b>3.3</b>                       |
| <b>PF0939</b>                            | putative 3-isopropylmalate<br>dehydratase | 1.9 ± 0.5                              | <b>3.8</b>                        | 1.4 ± 0.3                             | <b>2.7</b>                       |
| <b>PF0940</b>                            | probable isocitrate<br>dehydrogenase      | 2.4 ± 0.5                              | <b>5.3</b>                        | 1.5 ± 0.4                             | <b>2.8</b>                       |
| <b>PF0941</b>                            | alpha-isopropylmalate synthase            | 2.5 ± 0.5                              | <b>5.5</b>                        | 1.7 ± 0.2                             | <b>3.3</b>                       |
| <b>PF0942</b>                            | dihydroxy-acid dehydratase                | 2.4 ± 0.5                              | <b>5.2</b>                        | 1.5 ± 0.2                             | <b>2.8</b>                       |
| <b>Putative phosphate transporter</b>    |                                           |                                        |                                   |                                       |                                  |
| † <b>PF1020</b>                          | probable phosphate transport<br>protein   | 1.6 ± 0.4                              | <b>3.1</b>                        | 0.0 ± 0.5                             | 1.0                              |
| † <b>PF1021</b>                          | conserved hypothetical protein            | 1.4 ± 0.3                              | <b>2.7</b>                        | 0.1 ± 0.3                             | 1.1                              |

|                               |                                       |           |            |            |            |
|-------------------------------|---------------------------------------|-----------|------------|------------|------------|
| †PF1085                       | acetyl-CoA synthetase Q3 alpha        | 1.8 ± 0.2 | <b>3.5</b> | 0.6 ± 0.1  | 1.5        |
| †PF1085.1                     | hypothetical                          | 1.8 ± 0.4 | <b>3.4</b> | 0.1 ± 0.3  | 1.1        |
| <b>PF1404</b>                 | proteasome, subunit beta              | 1.0 ± 0.4 | 2.0        | 0.8 ± 0.3  | 1.7        |
| <b>PF1405</b>                 | polyadenylation specificity factor    | 1.4 ± 0.5 | <b>2.7</b> | 1.0 ± 0.3  | <b>2.1</b> |
| <b>PF1406</b>                 | probable threonine synthase           | 1.0 ± 0.5 | 2.0        | 0.9 ± 0.3  | 1.9        |
| PF1616                        | myo-inositol-1-phosphate synthetase   | 1.2 ± 0.2 | <b>2.3</b> | 0.8 ± 0.3  | 1.7        |
| <b>Histidine biosynthesis</b> |                                       |           |            |            |            |
| <b>PF1657</b>                 | histidyl-tRNA synthetase              | 1.1 ± 0.6 | <b>2.2</b> | 0.7 ± 0.3  | 1.6        |
| <b>PF1658</b>                 | ATP phosphoribosyltransferase         | 0.9 ± 0.6 | 1.8        | 0.5 ± 0.3  | 1.4        |
| <b>PF1659</b>                 | histidinol dehydrogenase              | 1.0 ± 0.5 | 2.0        | 0.7 ± 0.2  | 1.6        |
| <b>PF1660</b>                 | imidazoleglycerolphosphatedehydratase | 0.8 ± 0.6 | 1.8        | 0.7 ± 0.3  | 1.6        |
| <b>PF1661</b>                 | glutamine amidotransferase            | 0.8 ± 0.5 | 1.7        | 0.5 ± 0.3  | 1.4        |
| <b>PF1662</b>                 | HisA                                  | 1.1 ± 0.4 | <b>2.1</b> | 0.5 ± 0.3  | 1.4        |
| <b>PF1663</b>                 | imidazoleglycerol-phosphate synthase  | 0.7 ± 0.4 | 1.7        | 0.4 ± 0.2  | 1.4        |
| <b>PF1664</b>                 | phosphoribosyl-AMP cyclohydrolase     | 1.3 ± 0.4 | <b>2.5</b> | 0.6 ± 0.2  | 1.5        |
| <b>PF1665</b>                 | histidinol-phosphate aminotransferase | 1.0 ± 0.4 | <b>2.0</b> | 0.4 ± 0.2  | 1.3        |
| <b>PF1666</b>                 | conserved hypothetical protein        | 1.0 ± 0.3 | <b>2.0</b> | 0.4 ± 0.2  | 1.3        |
| PF1898                        | conserved hypothetical protein        | 1.2 ± 0.3 | <b>2.3</b> | 0.8 ± 0.3  | 1.7        |
| †PF1951                       | Archaeal asparagine synthetase A      | 1.1 ± 0.2 | <b>2.1</b> | -0.1 ± 0.2 | 1.1        |

<sup>a</sup> The ORF description is derived from the annotation in NCBI and TIGR databases. Potential operons are indicated by bold entries within a group where the intergenic distances are less than 30 nt.

<sup>b</sup> Description derived from NCBI database.

<sup>c</sup> The intensity ratio (-Fe/+Fe) is expressed as a log<sub>2</sub> value so that the standard deviation can be given. For comparison between ORFs, the apparent change in the expression level is also indicated. ORFs are listed that are more than twofold regulated or that are potentially part of an operon with twofold-regulated ORFs but which themselves are regulated by at least twofold.

<sup>d</sup> Calculated from the average log<sub>2</sub> intensity ratio.

† Genes significantly differentially regulated in COM1c2 and ΔDTXR.

**Table S2. ORFs whose expression is > 2-fold down-regulated under iron-limited conditions and their potential operon arrangement.**

| ORF <sup>a</sup>                    | Description <sup>b</sup>              | COM1c2<br>log <sub>2</sub> ± SD <sup>c</sup> | COM1c2<br>Fold<br>Change <sup>d</sup> | ΔDTXR<br>log <sub>2</sub> ± SD <sup>c</sup> | ΔDTXR<br>Fold<br>Change <sup>d</sup> |
|-------------------------------------|---------------------------------------|----------------------------------------------|---------------------------------------|---------------------------------------------|--------------------------------------|
| <b>Putative peptide transporter</b> |                                       |                                              |                                       |                                             |                                      |
| PF0191                              | peptide transporter                   | -0.8 ± 0.5                                   | 1.8                                   | -0.6 ± 0.4                                  | 1.5                                  |
| PF0192                              | oligopeptide transport                | -1.3 ± 0.5                                   | <b>2.5</b>                            | -1.1 ± 0.2                                  | <b>2.2</b>                           |
| PF0193                              | putative ABC transport                | -1.1 ± 0.6                                   | <b>2.1</b>                            | -1.0 ± 0.2                                  | <b>2.0</b>                           |
| PF0194                              | dipeptide ABC transporter             | -1.2 ± 0.6                                   | <b>2.2</b>                            | -1.1 ± 0.4                                  | <b>2.1</b>                           |
| PF0195                              | conserved hypothetical protein        | -0.7 ± 0.4                                   | 1.7                                   | -0.8 ± 0.3                                  | 1.7                                  |
| PF0196                              | glucose-6-phosphate<br>isomerase      | -0.4 ± 0.1                                   | 1.3                                   | -0.3 ± 0.3                                  | 1.2                                  |
| PF0341                              | conserved hypothetical protein        | -1.0 ± 0.5                                   | <b>2.0</b>                            | -0.7 ± 0.9                                  | 1.6                                  |
| †PF0346                             | aldehyde ferredoxin<br>oxidoreductase | -1.6 ± 0.4                                   | <b>3.0</b>                            | -0.9 ± 0.3                                  | 1.8                                  |
| <b>Putative cobalt transporter</b>  |                                       |                                              |                                       |                                             |                                      |
| PF0528                              | cobalt transport protein              | -0.8 ± 0.3                                   | 1.7                                   | 0.2 ± 0.2                                   | 1.1                                  |
| PF0529                              | conserved hypothetical protein        | -0.5 ± 0.3                                   | 1.4                                   | 0.2 ± 0.2                                   | 1.1                                  |
| PF0530                              | conserved hypothetical protein        | -0.8 ± 0.3                                   | 1.7                                   | 0.0 ± 0.3                                   | 1.0                                  |
| †PF0531                             | cobalamin biosynthesis protein        | -1.0 ± 0.5                                   | <b>2.0</b>                            | 0.0 ± 0.2                                   | 1.0                                  |
| PF0678                              | conserved hypothetical                | -1.0 ± 0.4                                   | <b>2.0</b>                            | -0.5 ± 0.2                                  | 1.4                                  |
| PF1032                              | cys rich ORF                          | -1.2 ± 0.6                                   | <b>2.3</b>                            | -0.7 ± 0.3                                  | 1.6                                  |
| PF1033                              | peroxiredoxin                         | -2.1 ± 0.4                                   | <b>4.3</b>                            | -2.0 ± 0.4                                  | <b>4.0</b>                           |
| PF1242                              | molybdopterin oxidoreductase          | -1.2 ± 0.1                                   | <b>2.2</b>                            | -1.0 ± 0.3                                  | <b>2.0</b>                           |
| PF1243                              | conserved hypothetical                | -1.0 ± 0.3                                   | 2.0                                   | -0.7 ± 0.4                                  | 1.7                                  |
| PF1244                              | Hypothetical                          | -1.0 ± 0.2                                   | 1.9                                   | -0.8 ± 0.4                                  | 1.8                                  |
| PF1890                              | conserved hypothetical protein        | -1.1 ± 0.1                                   | <b>2.1</b>                            | -0.4 ± 0.3                                  | 1.4                                  |
| <b>Putative sugar transporter</b>   |                                       |                                              |                                       |                                             |                                      |
| PF1936                              | putative sugar transport<br>protein   | -1.2 ± 0.5                                   | <b>2.3</b>                            | -1.2 ± 0.5                                  | <b>2.2</b>                           |
| PF1937                              | putative sugar transport<br>protein   | -1.3 ± 0.4                                   | <b>2.4</b>                            | -1.1 ± 0.5                                  | <b>2.2</b>                           |

|               |                              |            |            |            |            |
|---------------|------------------------------|------------|------------|------------|------------|
| <b>PF1938</b> | maltodextrin binding protein | -1.2 ± 0.6 | <b>2.3</b> | -1.1 ± 0.4 | <b>2.1</b> |
|---------------|------------------------------|------------|------------|------------|------------|

---

<sup>a</sup> The ORF description is derived either from the annotation in NCBI or TIGR databases. Potential operons are indicated by bold entries within a group where the intergenic distances are less than 30 nt.

<sup>b</sup> Description derived from NCBI database.

<sup>c</sup> The intensity ratio (-Fe/+Fe ) is expressed as a  $\log_2$  value so that the standard deviation can be given. For comparison between ORFs, the apparent change in the expression level is also indicated. ORFs are listed that are more than twofold regulated or that are potentially part of an operon with twofold-regulated ORFs but which themselves are not regulated by at least twofold.

<sup>d</sup> Calculated from the average  $\log_2$  intensity ratio.

<sup>†</sup> Genes significantly differentially regulated in COM1c2 and  $\Delta$ DTXR.

**Table S3. *Pyrococcus furiosus* ORFs potentially involved in iron transport.**

| <b>Locus<sup>a</sup></b>     | <b>Name</b> | <b>Annotation<sup>b</sup></b>                     | <b>TK homolog<sup>c</sup></b> |
|------------------------------|-------------|---------------------------------------------------|-------------------------------|
| <b>Ferrous Transporters</b>  |             |                                                   |                               |
| PF0723*                      | <i>ptr1</i> | Iron permease FTR1 family                         | -                             |
| <b>PF0857*</b>               | <i>feoB</i> | ferrous iron transport protein b                  | TK0714/TK0957                 |
| <b>PF0858</b>                | <i>feoA</i> | hypothetical protein                              | TK0715/TK0958                 |
| <b>ABC-type Transporters</b> |             |                                                   |                               |
| <b>PF0502</b>                |             | iron(III) dicitrate transport system permease     | TK2208                        |
| <b>PF0503</b>                |             | putative iron ABC transporter                     | TK2209                        |
| <b>PF0909</b>                |             | ferric enterobactin transport ATP-binding protein | TK0708/TK2020                 |
| <b>PF0910</b>                |             | iron (III) ABC transporter, permease protein      | TK0707/TK2019                 |
| <b>PF0911</b>                |             | iron (III) ABC transporter                        | TK0706/TK2018                 |
| PF1774                       |             | iron III ABC transporter, ATP-binding protein     | TK0865/TK0706/<br>TK2018      |

<sup>a</sup> Adjacent genes in bold are predicted to be in the same operon.

<sup>b</sup> Annotation based on TIGR and NCBI databases.

<sup>c</sup> Homologs in *Thermococcus kodakarensis* found using BLAST.

\*Genes significantly up-regulated in COM1c2 iron-limitation microarray.

**Figure S1. Effect of iron on the growth of *P. furiosus*.** Cells were grown under standard conditions on maltose except that the concentration of iron added to the medium was varied as indicated. Cultures were harvested at the end of the exponential growth phase and growth was determined by the amount of cellular protein. Typical growth curves are shown in Figure S2.

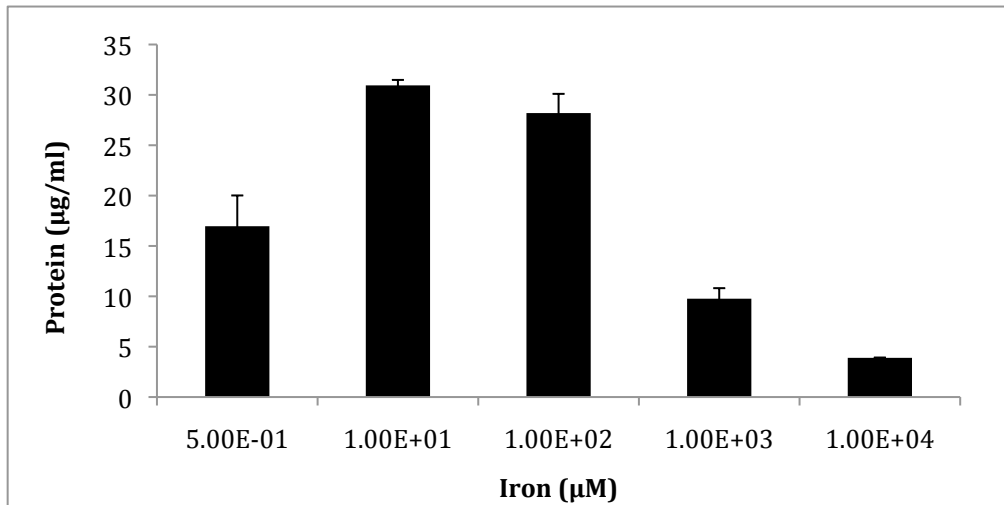

**Figure S2. Characterization of the  $\Delta$ FUR strain.** (a) Growth of  $\Delta$ FUR and COM1 in iron-sufficient and iron-limited conditions. Growth was monitored by assaying total cell protein at each time point. Results are shown for COM1 (circle),  $\Delta$ FUR (triangle) in iron-sufficient (closed) and iron-limited (open) conditions. (b) The effect of iron on the transcription of genes annotated as iron transporters in  $\Delta$ FUR was measured using quantitative PCR. Total RNA was prepared from  $\Delta$ FUR and COM1 grown in iron-sufficient and iron-limited conditions. The constitutively expressed gene encoding the pyruvate ferredoxin oxidoreductase (POR) gamma subunit (PF0971) was used as internal control. Shown is the ratio of change in gene expression in response to iron limitation in COM1 (closed bar) and  $\Delta$ FUR (open bar). The asterisk indicates qPCR confirmation of the deleted *fur* gene product in  $\Delta$ FUR.



a

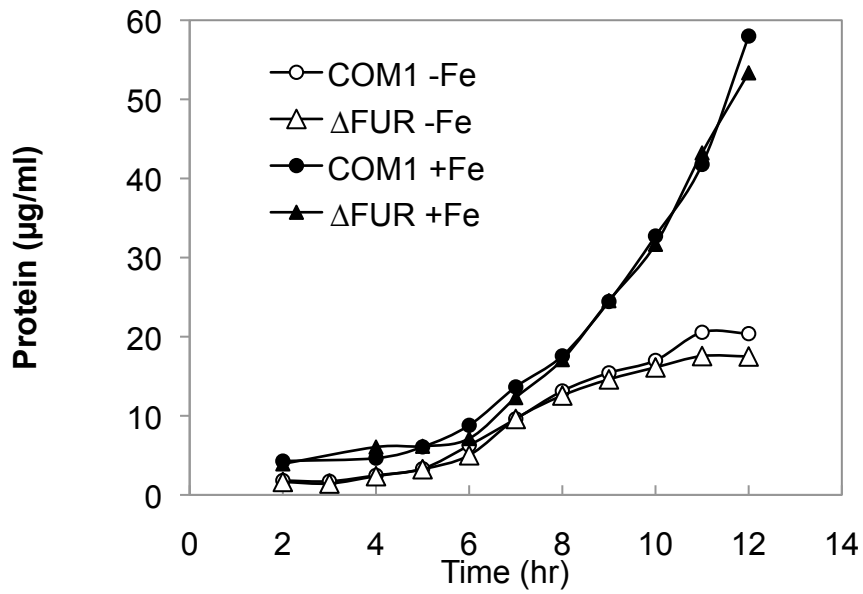

b

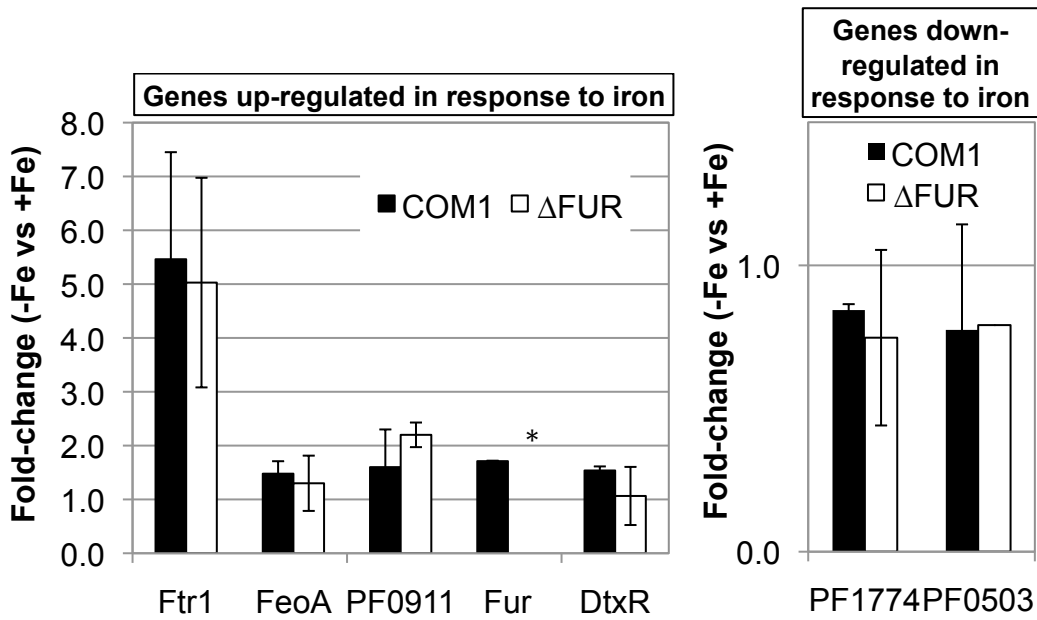

**Figure S3. DtxR protein sequence comparisons.** Protein sequence alignment of DtxRs (first ~60-bp in the N-terminus) in Thermococcaceae family species. Ton, *T. onnurineus*; Tk, *T. kadakarensis*; Tgam, *T. gammatolerans*; Temp, *T. barophilus*; Tsib, *T. sibiricus*; Ph, *P. horikoshii*; Pab, *P. abyssii*; Pf, *P. furiosus*. Pf0851 indicates the *P. furiosus* DtxR sequence predicted by NCBI and TIGR; Pf0851+ indicates the corrected protein sequence with the extra 12 amino acids at the N-terminus. The first methionine (M) in Pf0851+ is encoded by TTG instead of ATG. Same amino acids in protein sequences are marked by asterisks, similar amino acids are marked by colons (strong similarity) and dots (family similarity). (b) Protein sequence alignment of the *B. subtilis* MntR and the *P. furiosus* DtxR with the corrected sequence. Metal-binding residues characterized in *B. subtilis* MntR (10) and the homologous residues in *P. furiosus* are displayed in bold. The 12-amino acid sequence in the N-terminus of *P. furiosus* DtxR is underlined. Sequence alignment generated using ClustalW2.

**a**

```

Ton1956      MEISKREEEYLETIYILHKNKGIIRVKDIAKMMRVKPPSVVDALKKLNEKGLVEYEKYDR 60
Tk0107      MEVTKREEEYLETMYILHKNKGVIRVKDIAKALNVRPPSVVDALKKLAEKGLIEYEKYDR 60
Tgam0472    MQVSKREEEYLETMYLLYKSKGIIRVKDIAKRMNVKPPSVVIDALKKLSKGLVEYEKYDR 60
Termp01609  MEISKREEEYLEAMYLLYKRKGIIRIKDIAKCLRVRPPSVVDALKKLSEKGLVEYEKYDR 60
Tsib0121    MEISKREEEYLEVIYLLQKNKGVIRVKDISKRLGIRPPSVVDALKKLSEKGFVEYEKYDR 60
Ph1163      -MVKREEEYLEVMYLLQKNKGVIRVKDIAKILKVKPPSVVDALKKLSKKGLVEYEKHDR 59
Pab0714     -MVKREEEYLEVMYLLQKNKGVIRVKDIARVLKVKPPSVVDALKKLSKKGLIEYEKYDR 59
Pf0851     -----MYILQKNKGVIRVKDIAKMMRVKPPPTVVEALKKLRDKGFVKYEEHEH 47
Pf0851+    -MPSKREEEYLETMYILQKNKGVIRVKDIAKMMRVKPPPTVVEALKKLRDKGFVKYEEHEH 59
              :***** :*. * **:**:**: : ::**:**:***** .**:**:**:

```

**b**

```

BsMntR      MTTPSMEDYIEQIYMLIEEKGYARVSDIAEALAVHPSSVTKMVQKLDKDEYLIYEKYRGLVLTSGKKGIGK
PfdtxR      MPSKREEEYLETMYILQKNKGVIRVKDIAKMMRVKPPPTVVEALKKLRDKGFVKYEEHEHILLTEKGLEVAK
              *.: *:** * **:**:**: : *:**:**: :** .. : *:**. :**.* ** :.*
BsMntR      RLVYRHELL-EQFLRIIGVDEEKIYNDVEGIEHHLWSNSIDRIGDLVQYFEEDD--ARKKDLKSIQKKTEH
PfdtxR      KTYSKHQLLTEFFINILGIPPEIAERDACQFEHYVSEVTVHRIREFISYIQQECYPYALKQFLKKVREKDQA
              : :** * * **:**: * .*. **:**: :** ** :**:**: * * : **:**:
BsMntR      HNQ
PfdtxR      VAK
              :

```

**Figure S4. Electrophoretic Mobility Shift Assay results of recombinant t-DtxR and Fur with the putative promoter of *feoAB*.** 100 nM promoter DNA ( $P_{\text{ORF}}$ , putative promoter region, which is the -200 to +50 bp sequence relative to the translation start site of the corresponding ORF) was incubated with truncated DtxR (t-DtxR) and Fur. Protein/Nucleic acid (P/N) ratios are listed above each lane.

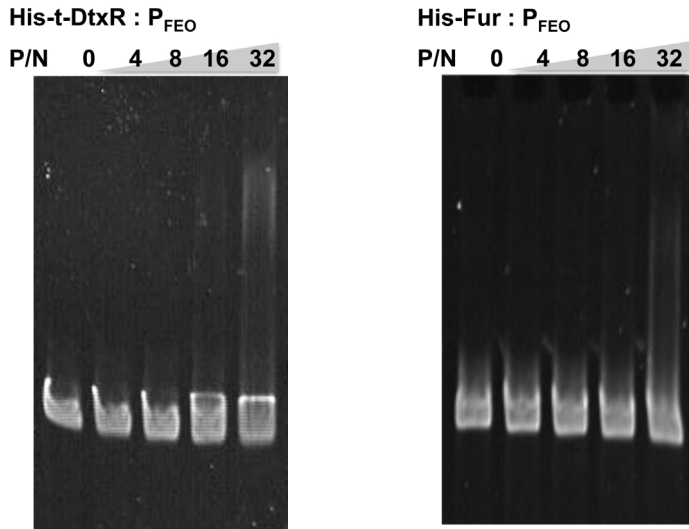

**Figure S5. Electrophoretic Mobility Shift Assay results of recombinant DtxR and Fur with the putative promoters of *ftr1*, *feoAB* and *pf0849*.** 100 nM promoter DNA ( $P_{ORF}$ , putative promoter region, which is the -200 to +50 bp sequence relative to the translation start site of the corresponding ORF) was incubated with full-length DtxR (lane 1-5) and with heparin added from 0.2 to 2000 ng/ $\mu$ L as a protein-binding competitor (lane 6-10). PF0849 promoter was used as a negative control. Protein/Nucleic acid (P/N) ratios are listed above each lane.

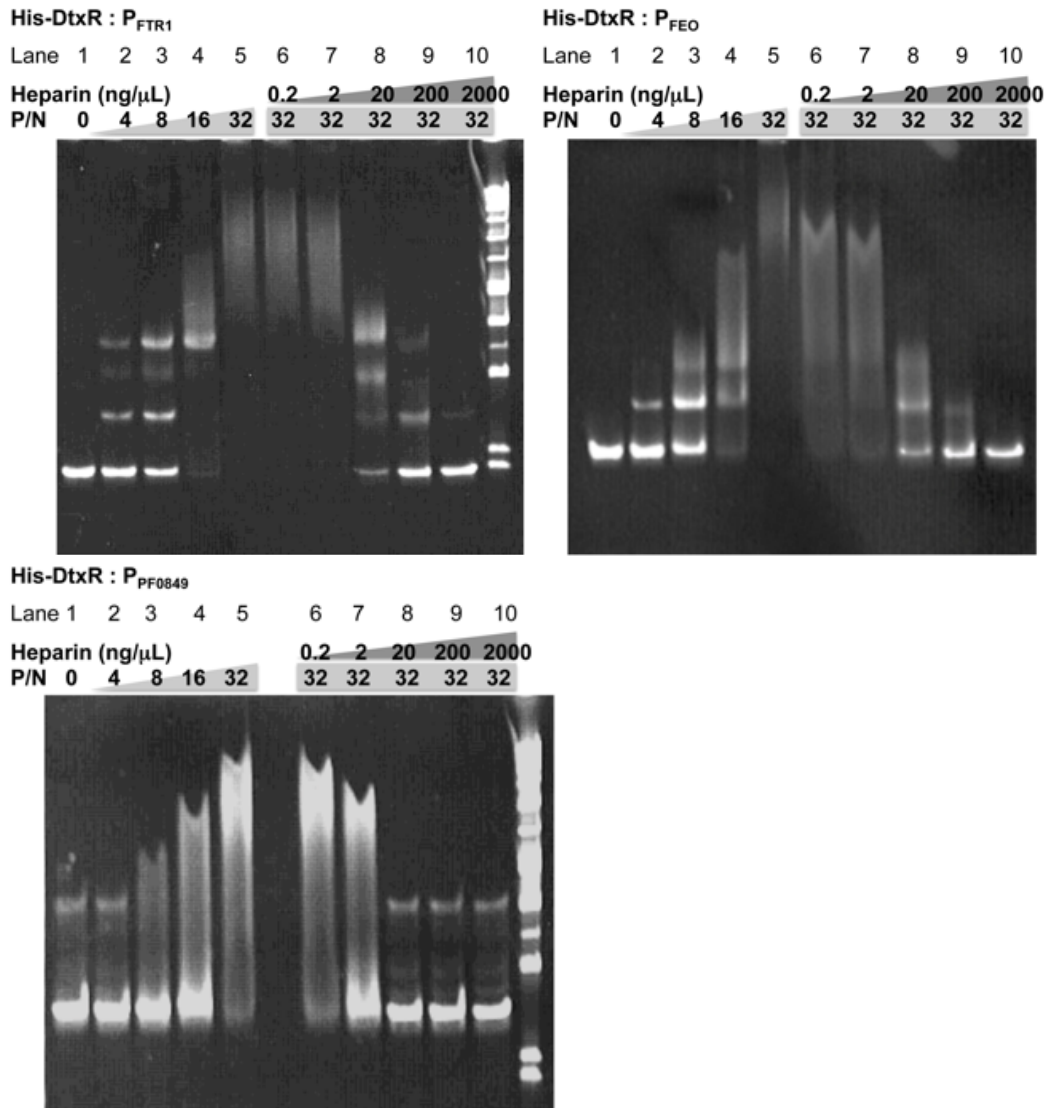

**Figure S6. Transcription of annotated iron transporters in  $\Delta$ FTR1 in response to iron.** The effect of iron on the transcription of genes annotated as iron transporters in  $\Delta$ FTR1 was measured using quantitative PCR. Total RNA was prepared from  $\Delta$ FTR1 and COM1 grown in iron-sufficient and iron-limited conditions. The constitutively expressed gene encoding the pyruvate ferredoxin oxidoreductase (POR) gamma subunit (PF0971) was used as an internal control. Shown is the ratio of change in gene expression in response to iron limitation in COM1 (closed bar) and  $\Delta$ FTR1 (open bar). The asterisk indicates qPCR confirmation of the deleted *ftr1* gene product in  $\Delta$ FTR1.

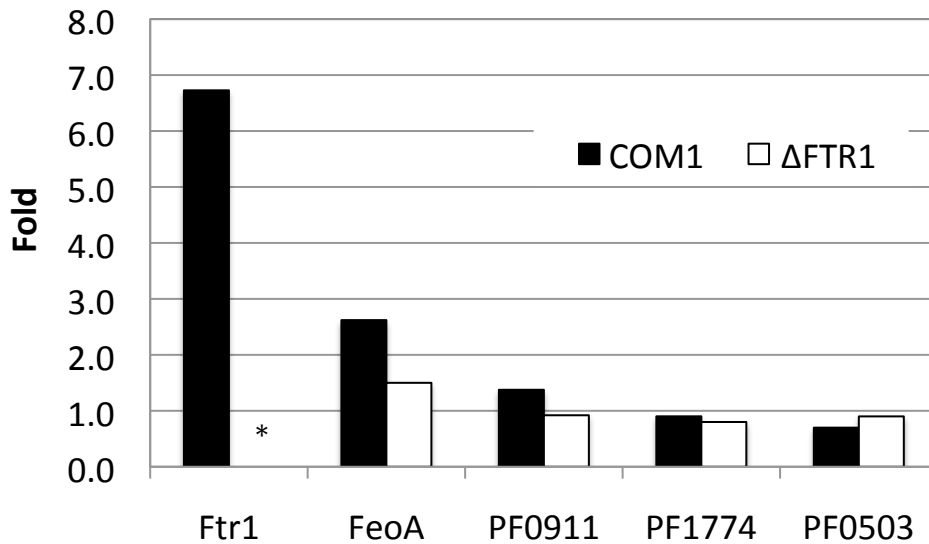

**Figure S7. Schematic depiction of the role of DtxR in regulation of gene transcription in *P. furiosus*.** DtxR represses the transcription of *ftr1* and *feoAB* in the presence of iron; it also represses the transcription of AOR and the putative cobalt transporter PF0528-PF0531 indirectly (dashed arrow) in the absence of iron.

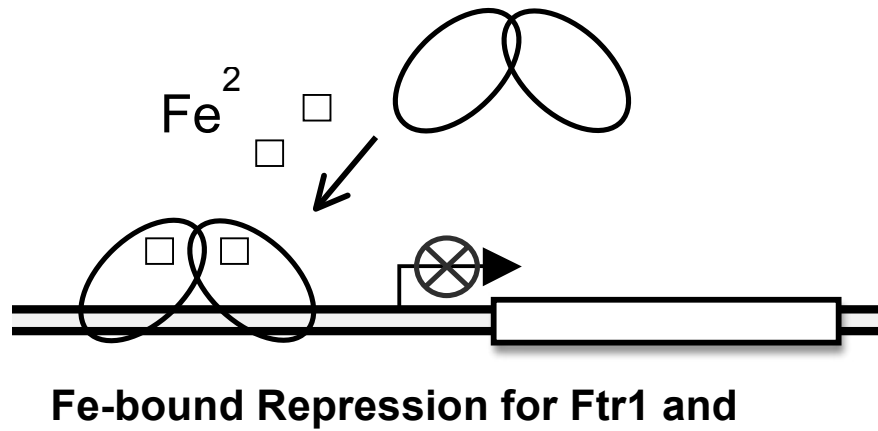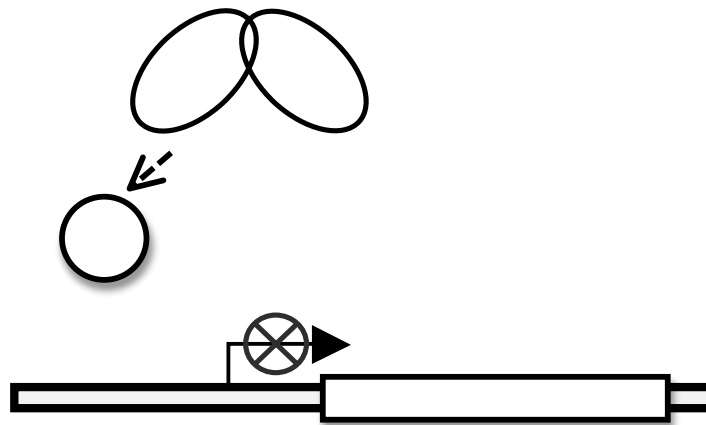

**Indirect Fe-free Repression for AOR and PF0528-PF0531**
